# Supplementary material for: Unveiling the (de-)lithiation mechanism of nano-sized LiMn2O4 allows the design of a cycling protocol for achieving long-term cycling stability
Source: Royal Society of Chemistry journal article supplement (doi:10.1039/d3ta04660e), 2023-01-01
Supplement: d3ta04660e1.pdf [file d3ta04660e1.pdf]

## Supplementary Information

### Unveiling the (de-)lithiation mechanism of nano-sized $\text{LiMn}_2\text{O}_4$ allows to design a cycling protocol for achieving long-term cycling stability

Juliana B. Falqueto<sup>1,2\*</sup>, Adam H. Clark<sup>3</sup>, Łukasz Kondracki<sup>2</sup>, Nerilso Bocchi<sup>1</sup>, Mario El Kazzi<sup>2\*</sup>

<sup>1</sup> Federal University of São Carlos, Department of Chemistry, C.P. 676, 13560-970 São Carlos - SP, Brazil

<sup>2</sup> Electrochemistry Laboratory, PSI, CH-5232 Villigen PSI, Switzerland

<sup>3</sup> Photon Science Division, PSI, CH-5232 Villigen PSI, Switzerland

\* Corresponding author: [juliana.bruneli-falqueto@psi.ch](mailto:juliana.bruneli-falqueto@psi.ch), [mario.el-kazzi@psi.ch](mailto:mario.el-kazzi@psi.ch)

The following Supplementary Information contains:

- EIS spectra acquired after the 1<sup>st</sup> discharge at 2.0 V + 5 min of OCP, for electrodes prepared from nano and micron-sized spinel samples.
- Reverse Monte Carlo results of *operando* EXAFS data for nano-sized spinel.
- *Operando* diffraction patterns collected at different cycling states for nano-sized spinel.
- Results of the Rietveld analysis of *operando* XRD patterns: amount of tetragonal phase and I41/amd lattice cell parameters *a* and *c*, tables, and plots of the fits.
- *Operando* XRD to track the evolution of different structures during 1<sup>st</sup> cycle and 2<sup>nd</sup> charge of electrode prepared from micron-sized  $\text{LiMn}_2\text{O}_4$  spinel before and after correction the patterns intensity.
- Specific discharge capacity obtained for the cathodes cycled in a voltage range of 2.0 to 4.3 V using the cycling protocol proposed.

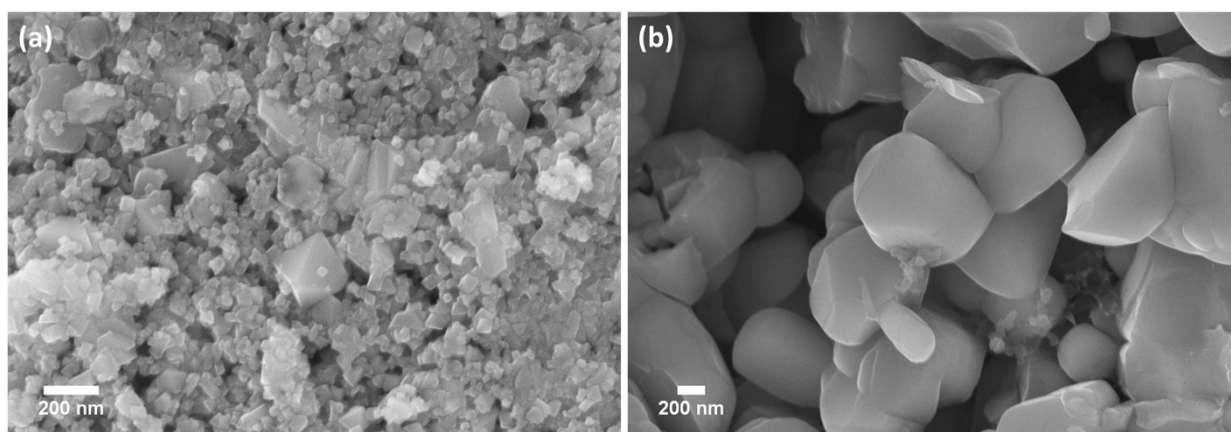

**Figure S. 1.** SEM images of (a) nano and (b) micron-sized LMO spinel cathodes before cycling.

**Figure S.2** shows the EIS spectra, which monitor the internal resistance to charge transfer of the spinel active materials after the 1<sup>st</sup> discharge at 2.0 V and 5 min of OCP. The size of the depressed semicircles in the Nyquist plots represent the charge transfer resistance ( $R_{CT}$ ) contribution from the cathode–electrolyte interface and the high-frequency x-intercept represent the Ohmic resistance of the electrolyte. In the discharging state, after the electrodes completing 5 min of OCP rest, were observed a smaller semicircle for the nano-sized spinel electrode than for micron-sized. This result indicates that the nanoparticles present a lower  $R_{CT}$  than the micron particles at this potential, which corroborates with the results from *operando* XAS measurements. Micron-sized spinel, in comparison with the nano-sized, presents a bigger hindrance to reduce the  $Mn^{4+}$  to  $Mn^{3+}$ , what indicates a higher resistance to transfer charge and, consequently, Li ion insertion into the structure of the cathode is compromised.

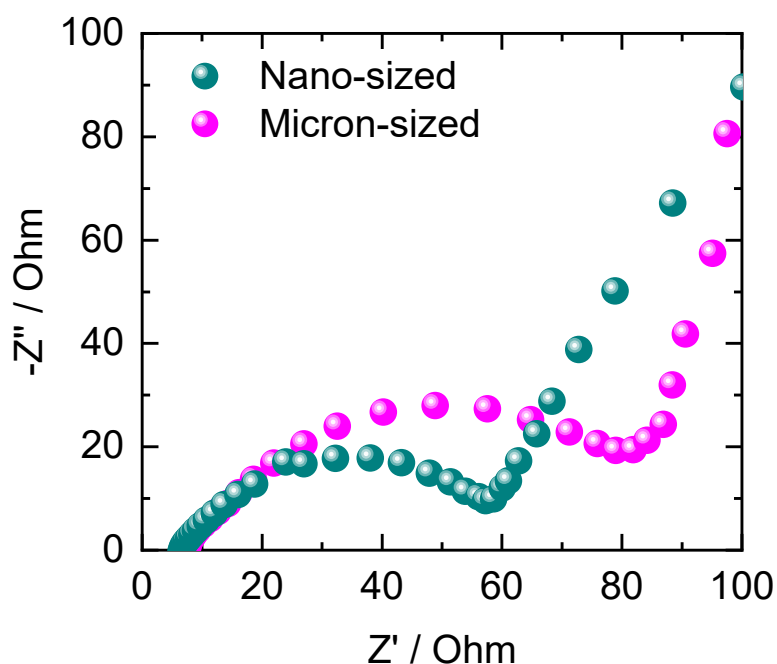

**Figure S.2.** EIS spectra acquired in after the 1<sup>st</sup> discharge at 2.0 V + 5 min of OCP, for electrodes prepared from nano and micron-sized spinel samples.

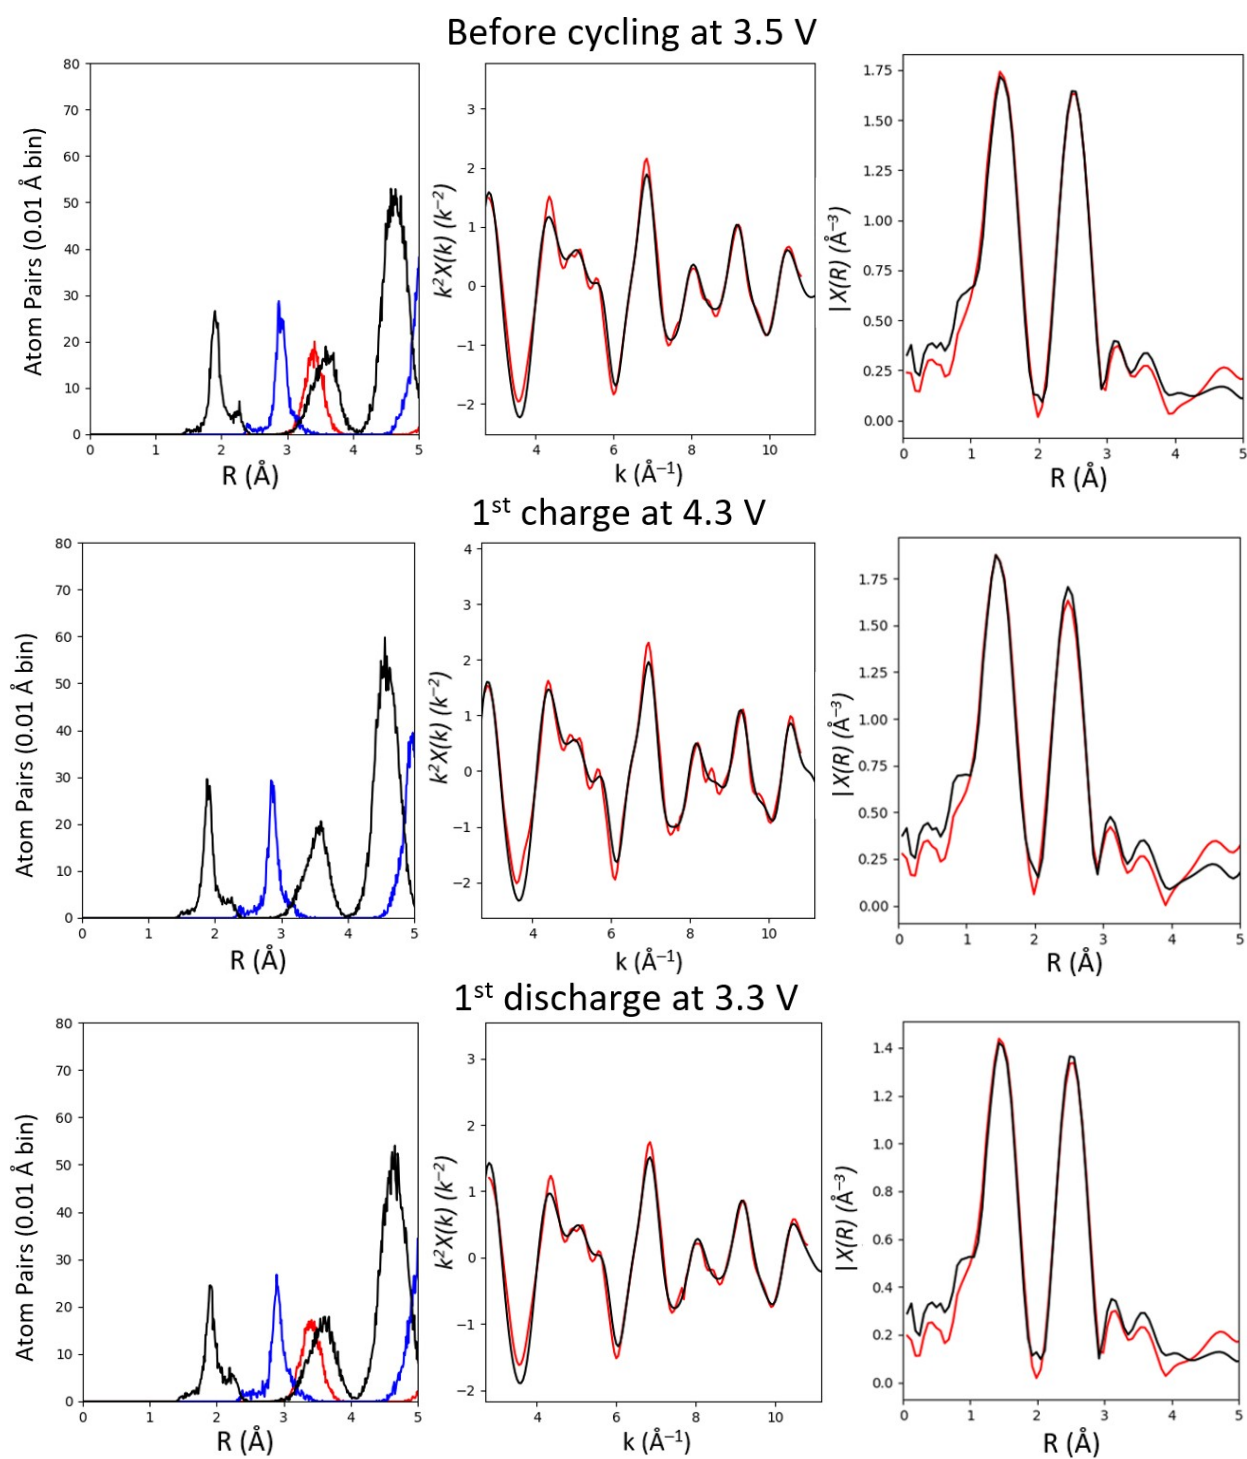

**Figure S.3.** Reverse Monte Carlo results of *operando* EXAFS data of nano-sized spinel collected before cycling at 3.5 V, 1<sup>st</sup> charge at 4.3 V and 1<sup>st</sup> discharge at 3.3 V.

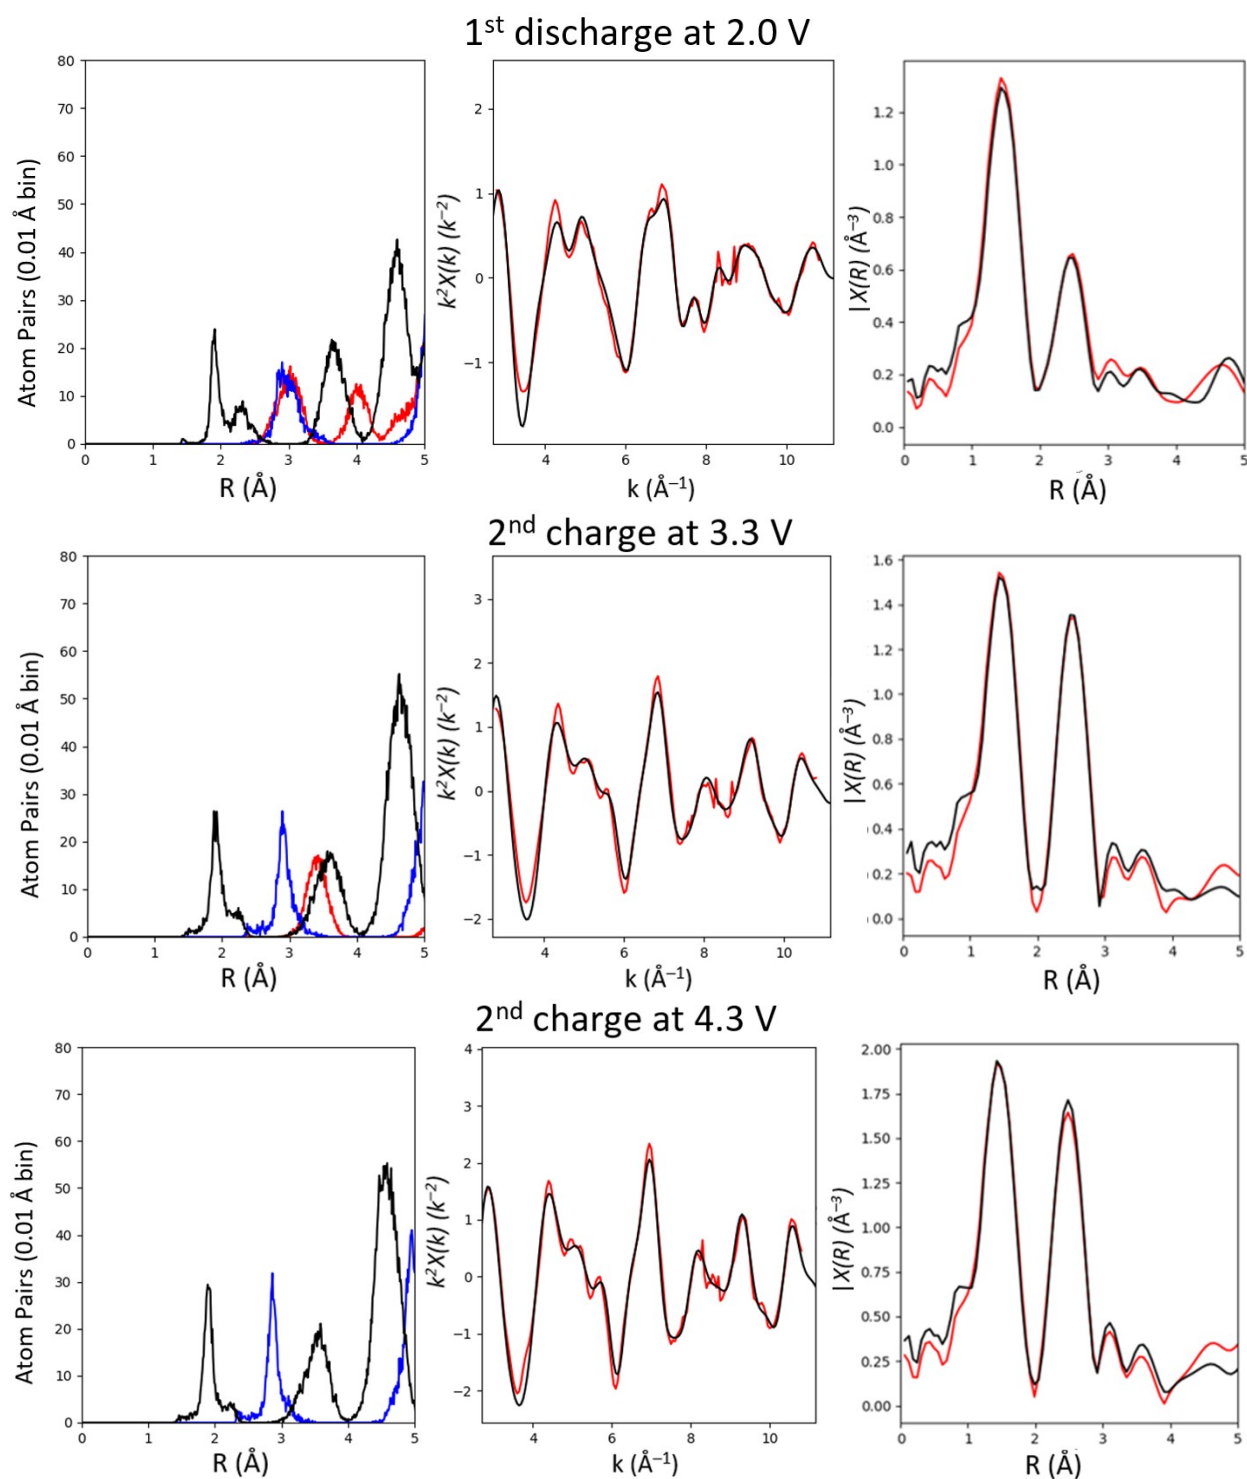

**Figure S.4.** Reverse Monte Carlo results of *operando* EXAFS data of nano-sized spinel collected 1<sup>st</sup> discharge at 2.0 V, 2<sup>nd</sup> charge at 3.3 V and 2<sup>nd</sup> charge at 4.3 V.

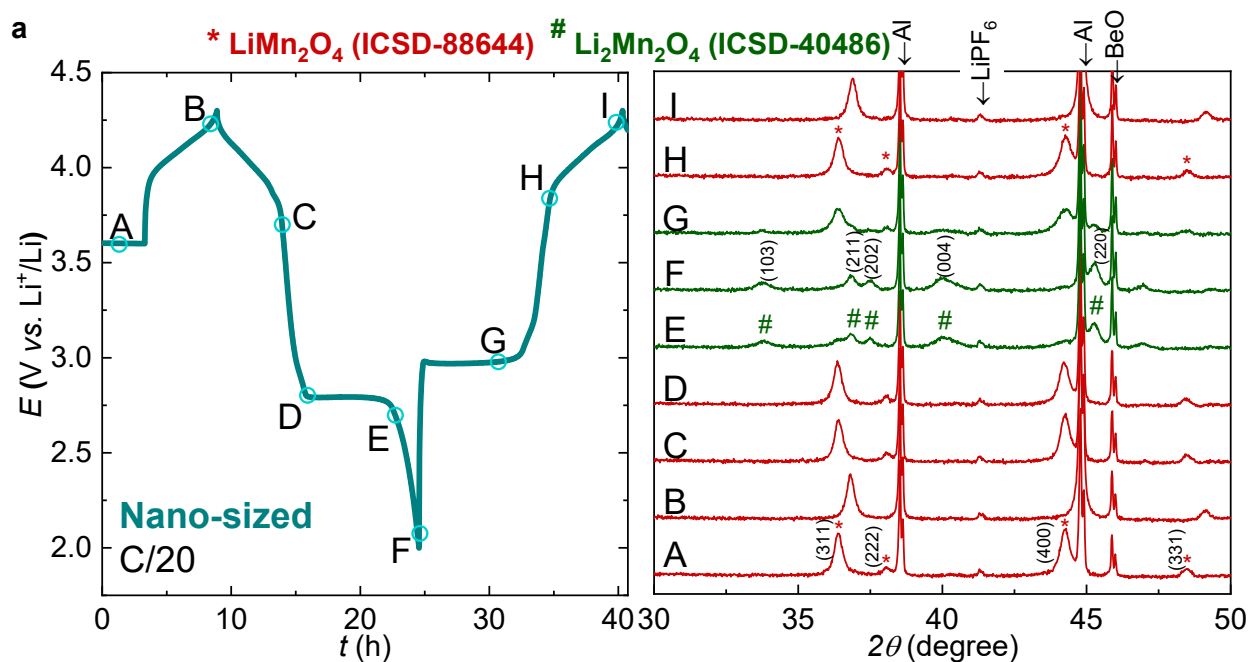

**Figure S.5.** Operando diffraction patterns (right panels) collected at different cycling (left panels) states to directly monitor the structural evolution of the nano-sized Li-rich  $\text{Li}_x\text{Mn}_{2-x}\text{O}_4$  spinel cathode during one and a half cycles of charging to 4.3 V and deep discharging to 2.0 V at C/20 rate.

Comparison of FWHM of (311) reflection from main cubic phase in single-phase region of the nano-sized LMO cathode can be seen in the Figure 1. The difference between OCV and points during cycling comes from dynamic changes of crystal structure. However, the same cycling rate for the 1<sup>st</sup> and the 2<sup>nd</sup> charges and the same values of FWHM indicate lack of changes in crystallinity for this cathode material.

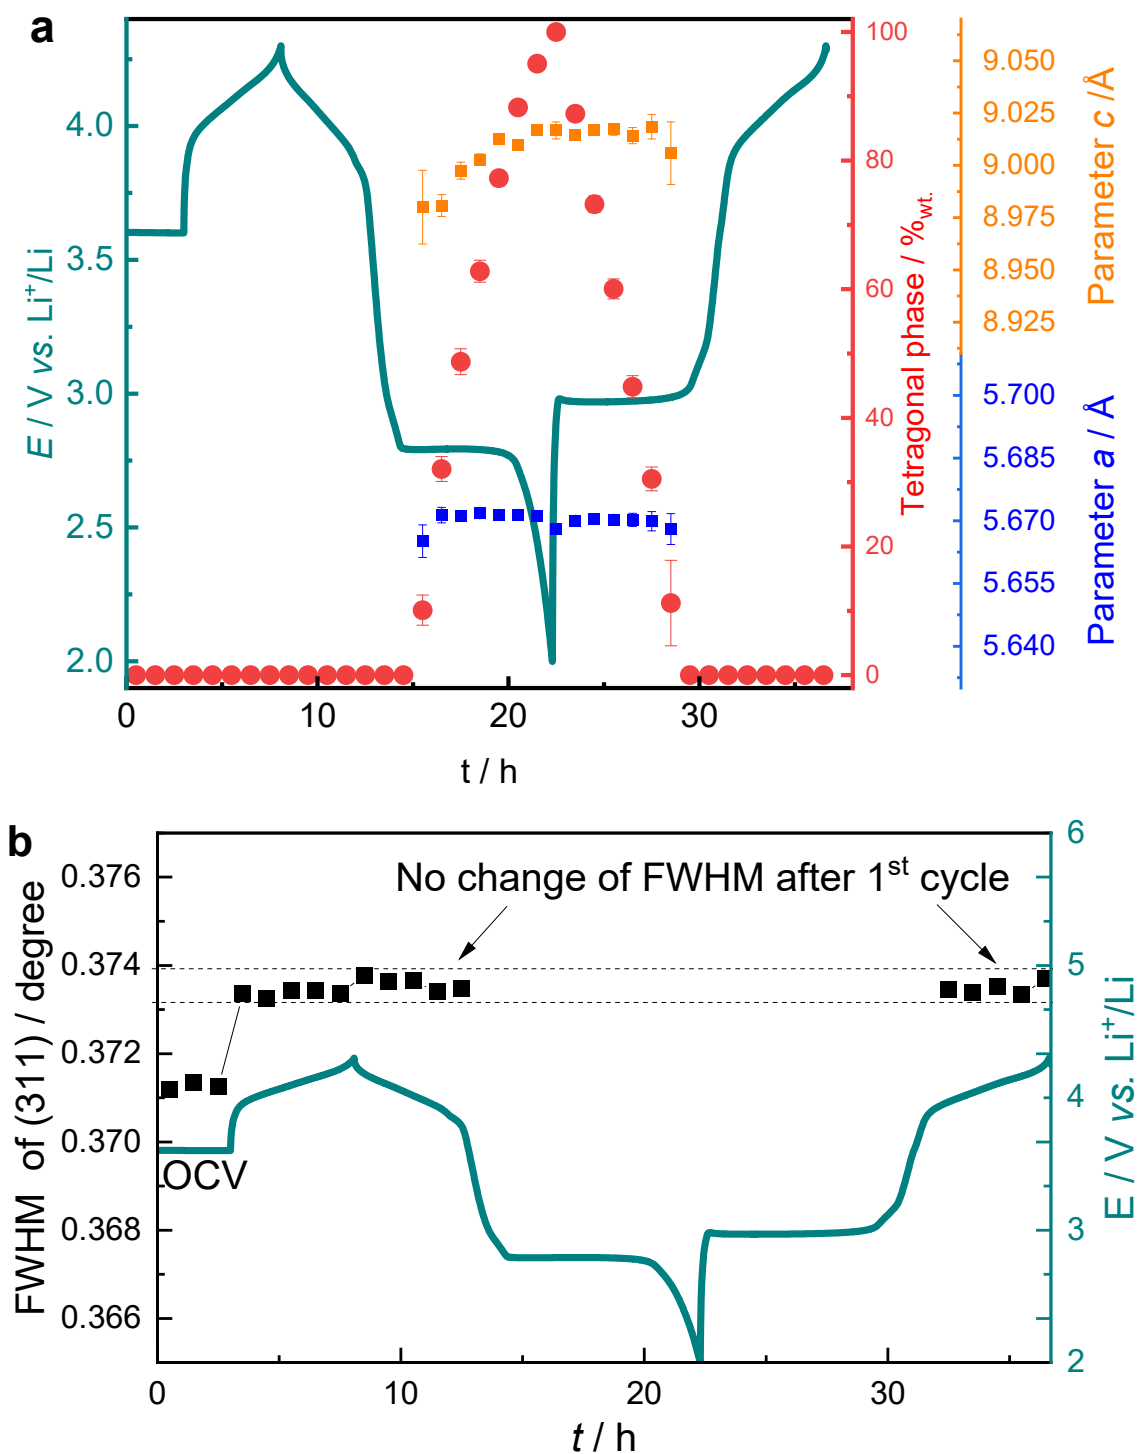

**Figure S.6. Operando XRD analysis to track the evolution of different structures during the 1<sup>st</sup> cycle and the 2<sup>nd</sup> charge between 2.0 and 4.3 V of nano-sized Li-rich  $Li_{1+x}Mn_{2-x}O_4$  spinel sample. (a)** Galvanostatic charge/discharge profile of nano-sized spinel cathode (left axis, green) presented with corresponding results of Rietveld analysis of *operando* XRD patterns: amount of tetragonal phase (right axis, red) and *I41/amd* lattice cell parameters *a* and *c* (right axis, blue and orange, respectively). **(b)** Galvanostatic charge/discharge profile (right axis, green) presented with the corresponding FWHM of (311) reflection from main cubic phase (left axis, black) calculated by Rietveld refinement of *operando* XRD patterns.

For the upper voltage range presented in the Table S.1 (data from *post mortem* XRD collected in the MS beamline at PSI and reported in our previously work Falqueto et al. (2022), the FWHM values of the reflections for the cubic spinel phase do not change comparing the as-synthesized with different cycling states (1<sup>st</sup> charge at 4.3 V, 1<sup>st</sup> discharge at 3.3 V, and after 200 cycles after discharge).

**Table S.1.** FWHM of the reflections for the nano-sized LMO spinel as-synthesized and at different cycling states between 3.3 and 4.3 V vs. Li<sup>+</sup>/Li at C/10 rate. The FWHM were extracted using the Pseudo-Voigt function in the fit analysis.

|            | As-synthesized |                | 1 <sup>st</sup> charge at 4.3 V |                | 1 <sup>st</sup> discharge at 3.3 V |                | 200 cycles after discharge |                |
|------------|----------------|----------------|---------------------------------|----------------|------------------------------------|----------------|----------------------------|----------------|
| Reflection | FWHM / degree  | Standard Error | FWHM / degree                   | Standard Error | FWHM / degree                      | Standard Error | FWHM / degree              | Standard Error |
| (111)      | 0.06623        | 0.00017        | 0.06080                         | 0.00010        | 0.06362                            | 0.00015        | 0.06353                    | 0.00013        |
| (311)      | 0.09343        | 0.00050        | 0.07692                         | 0.00025        | 0.08865                            | 0.00040        | 0.08973                    | 0.00037        |
| (222)      | 0.07905        | 0.00227        | 0.07470                         | 0.00120        | 0.07758                            | 0.00173        | 0.07744                    | 0.00168        |
| (400)      | 0.11153        | 0.00050        | 0.08343                         | 0.00020        | 0.10442                            | 0.00041        | 0.10508                    | 0.00038        |
| (331)      | 0.10170        | 0.00214        | 0.08265                         | 0.00099        | 0.09617                            | 0.00167        | 0.09537                    | 0.00157        |
| (511)      | 0.12254        | 0.00141        | 0.09346                         | 0.00060        | 0.11420                            | 0.00116        | 0.11536                    | 0.00109        |
| (440)      | 0.11964        | 0.00074        | 0.09546                         | 0.00035        | 0.10992                            | 0.00060        | 0.11112                    | 0.00056        |
| (531)      | 0.12318        | 0.00208        | 0.09730                         | 0.00082        | 0.11518                            | 0.00156        | 0.11795                    | 0.00152        |

**Table S.2.** Summary of Rietveld analysis results for the nano-sized Li-rich  $\text{Li}_x\text{Mn}_{2-x}\text{O}_4$  spinel.

| time / h | Rwp    | Cubic phase, $Fd-3m$ |                   | Tetragonal phase, $I4_1/adm$ |                   |                   |
|----------|--------|----------------------|-------------------|------------------------------|-------------------|-------------------|
|          |        | Amount / %wt.        | parameter $a$ / Å | amount / %wt.                | parameter $a$ / Å | parameter $c$ / Å |
| 0.5      | 3.6018 | 100                  | 8.1947 (34)       | 0                            |                   |                   |
| 1.5      | 3.4955 | 100                  | 8.1945 (33)       | 0                            |                   |                   |
| 2.5      | 3.6922 | 100                  | 8.1951 (35)       | 0                            |                   |                   |
| 3.5      | 3.6277 | 100                  | 8.1871 (34)       | 0                            |                   |                   |
| 4.5      | 3.8721 | 100                  | 8.1685 (36)       | 0                            |                   |                   |
| 5.5      | 3.9582 | 100                  | 8.1486 (38)       | 0                            |                   |                   |
| 6.5      | 3.9240 | 100                  | 8.1277 (39)       | 0                            |                   |                   |
| 7.5      | 3.9930 | 100                  | 8.1029 (40)       | 0                            |                   |                   |
| 8.5      | 3.9023 | 100                  | 8.1080 (39)       | 0                            |                   |                   |
| 9.5      | 3.9966 | 100                  | 8.1321 (39)       | 0                            |                   |                   |
| 10.5     | 3.7797 | 100                  | 8.1546 (36)       | 0                            |                   |                   |
| 11.5     | 3.6883 | 100                  | 8.1767 (35)       | 0                            |                   |                   |
| 12.5     | 3.6610 | 100                  | 8.1930 (35)       | 0                            |                   |                   |
| 13.5     | 3.7561 | 100                  | 8.1975 (35)       | 0                            |                   |                   |
| 14.5     | 3.8653 | 100                  | 8.2002 (38)       | 0                            |                   |                   |
| 15.5     | 3.6610 | 89.9 (1.1)           | 8.2001 (43)       | 10.1 (2.4)                   | 5.6651 (39)       | 8.9800 (176)      |
| 16.5     | 3.7278 | 68.0 (0.9)           | 8.2009 (53)       | 32.0 (1.9)                   | 5.6714 (19)       | 8.9808 (52)       |
| 17.5     | 3.9456 | 51.3 (0.9)           | 8.1990 (68)       | 48.7 (2.0)                   | 5.6711 (13)       | 8.9975 (41)       |
| 18.5     | 3.8729 | 37.2 (0.7)           | 8.1993 (87)       | 62.8 (1.7)                   | 5.6718 (10)       | 9.0027 (28)       |
| 19.5     | 3.8731 | 22.7 (0.7)           | 8.2014 (132)      | 77.3 (1.2)                   | 5.6715 (09)       | 9.0124 (20)       |
| 20.5     | 3.8007 | 11.8 (0.6)           | 8.2026 (240)      | 88.2 (0.6)                   | 5.6715 (07)       | 9.0097 (17)       |
| 21.5     | 4.0041 | 4.9 (0.6)            | 8.2018 (571)      | 95.1 (0.7)                   | 5.6712 (07)       | 9.0168 (15)       |
| 22.5     | 3.8729 | 0                    |                   | 100                          | 5.6681 (10)       | 9.0167 (41)       |
| 23.5     | 3.8294 | 12.7 (0.6)           | 8.1986 (228)      | 87.3 (1.2)                   | 5.6701 (07)       | 9.0146 (16)       |
| 24.5     | 3.8306 | 26.8 (0.7)           | 8.1960 (118)      | 73.2 (1.3)                   | 5.6704 (09)       | 9.0169 (20)       |
| 25.5     | 3.9187 | 39.9 (0.8)           | 8.1962 (86)       | 60.1 (1.5)                   | 5.6703 (12)       | 9.0172 (28)       |
| 26.5     | 3.9691 | 55.2 (0.9)           | 8.1966 (68)       | 44.8 (1.7)                   | 5.6702 (16)       | 9.0142 (39)       |
| 27.5     | 4.0726 | 69.5 (1.0)           | 8.1964 (59)       | 30.5 (1.9)                   | 5.6699 (23)       | 9.0185 (59)       |
| 28.5     | 4.0374 | 88.8 (2.7)           | 8.1966 (51)       | 11.2 (6.6)                   | 5.6680 (37)       | 9.0058 (150)      |
| 29.5     | 4.1508 | 100                  | 8.1970 (45)       | 0                            |                   |                   |
| 30.5     | 4.0341 | 100                  | 8.1955 (42)       | 0                            |                   |                   |
| 31.5     | 3.9535 | 100                  | 8.1912 (40)       | 0                            |                   |                   |
| 32.5     | 3.8205 | 100                  | 8.1740 (38)       | 0                            |                   |                   |
| 33.5     | 3.8193 | 100                  | 8.1551 (39)       | 0                            |                   |                   |
| 34.5     | 3.7814 | 100                  | 8.1351 (41)       | 0                            |                   |                   |
| 35.5     | 3.7510 | 100                  | 8.1127 (43)       | 0                            |                   |                   |
| 36.5     | 3.5802 | 100                  | 8.0903 (40)       | 0                            |                   |                   |

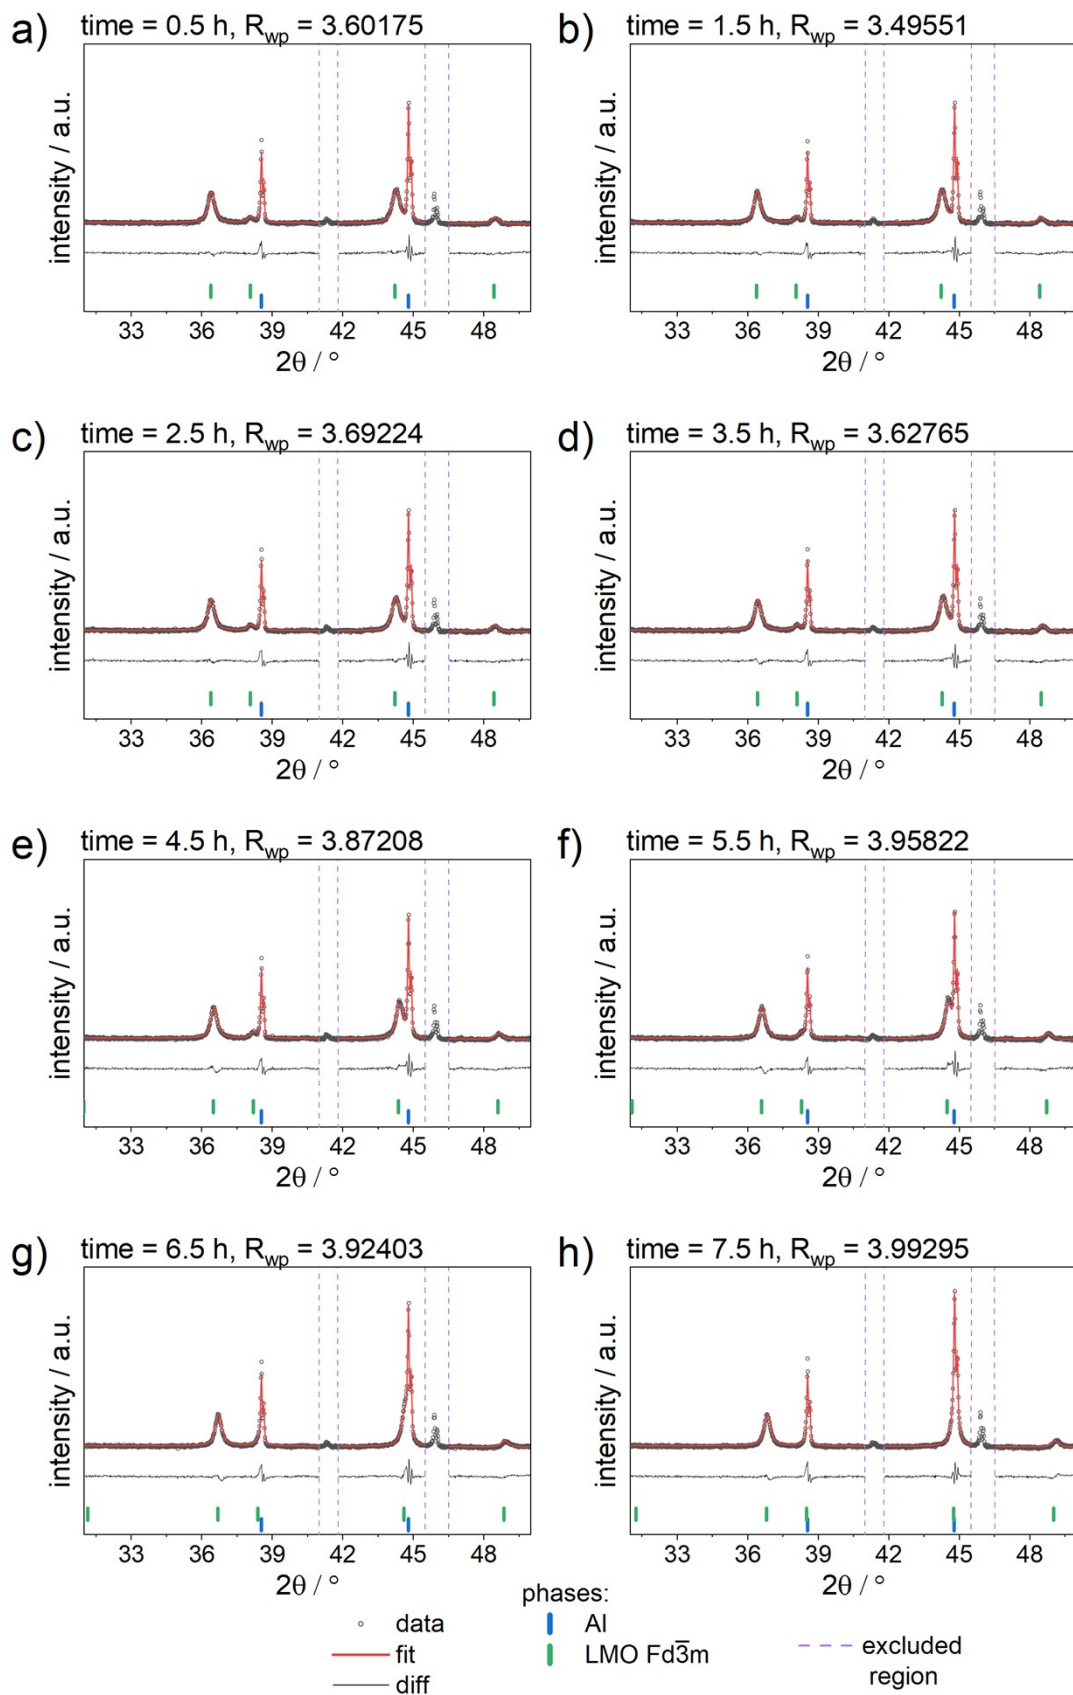

**Figure S.7.** Rietveld refinement results of *operando* XRD data of nano-sized spinel collected for scans 1 - 8 (a-h).

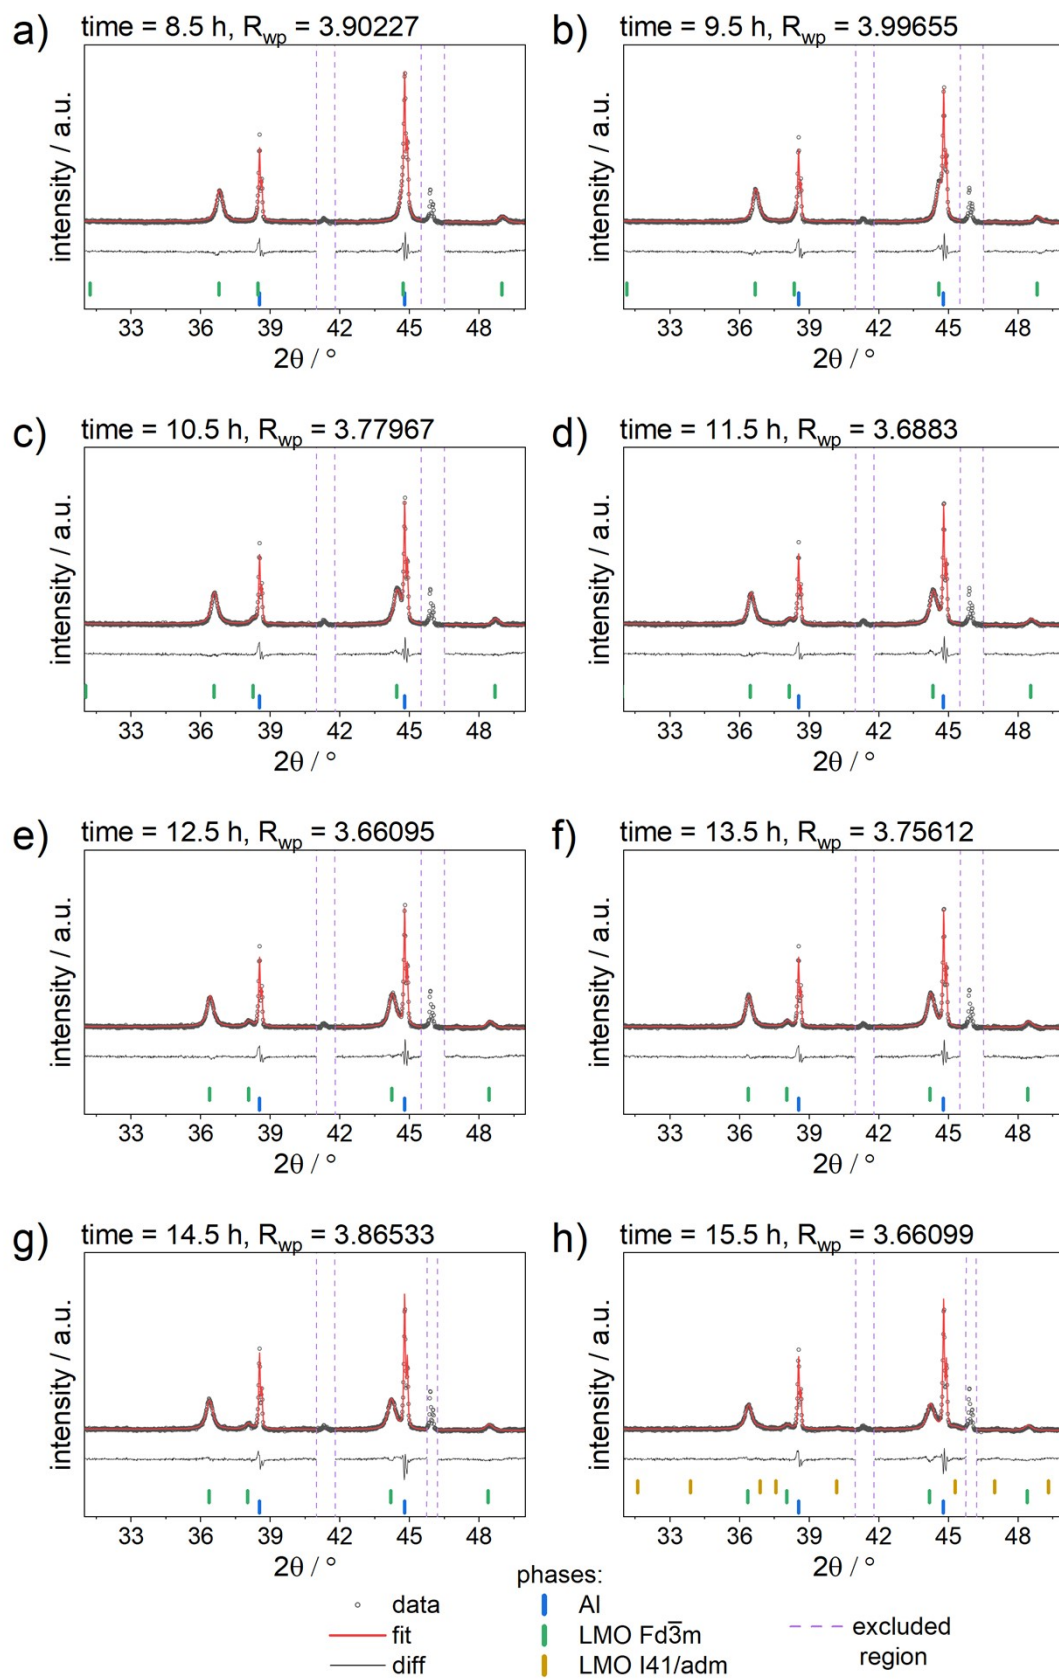

**Figure S.8.** Rietveld refinement results of *operando* XRD data of nano-sized spinel collected for scans 9 - 16 (a-h).

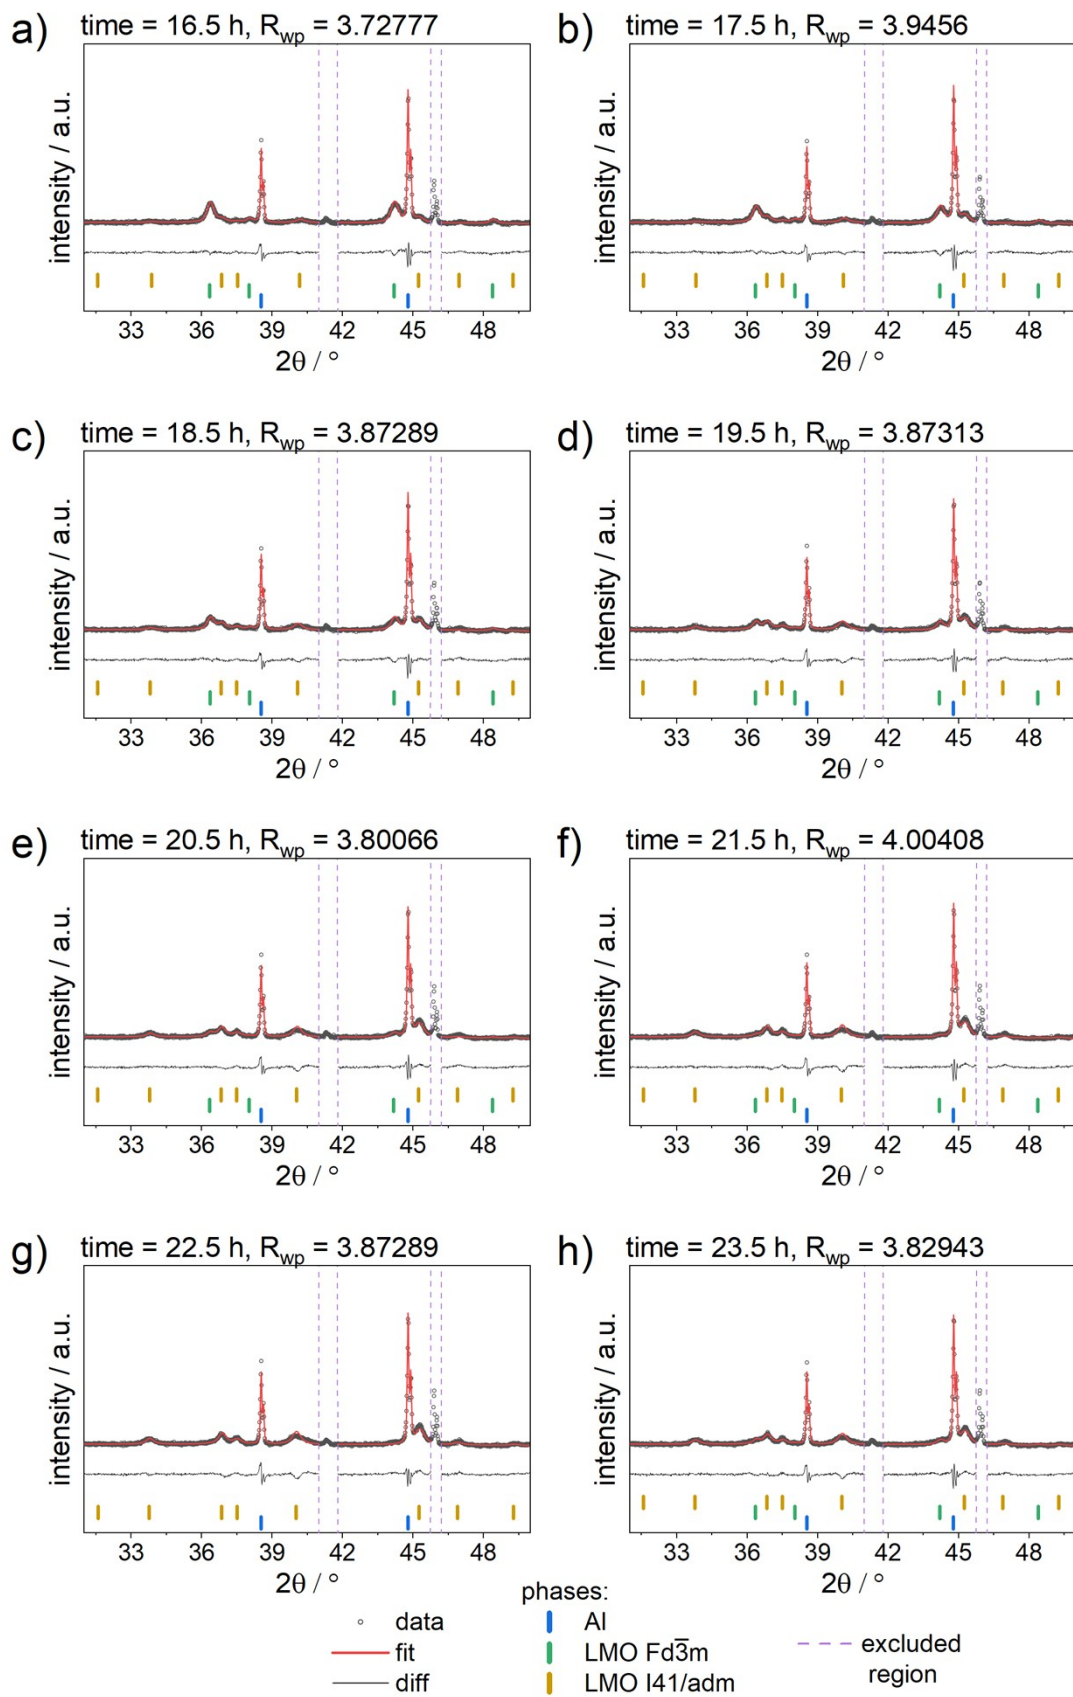

**Figure S.9.** Rietveld refinement results of *operando* XRD data of nano-sized spinel collected for scans 17 - 24 (a-h).

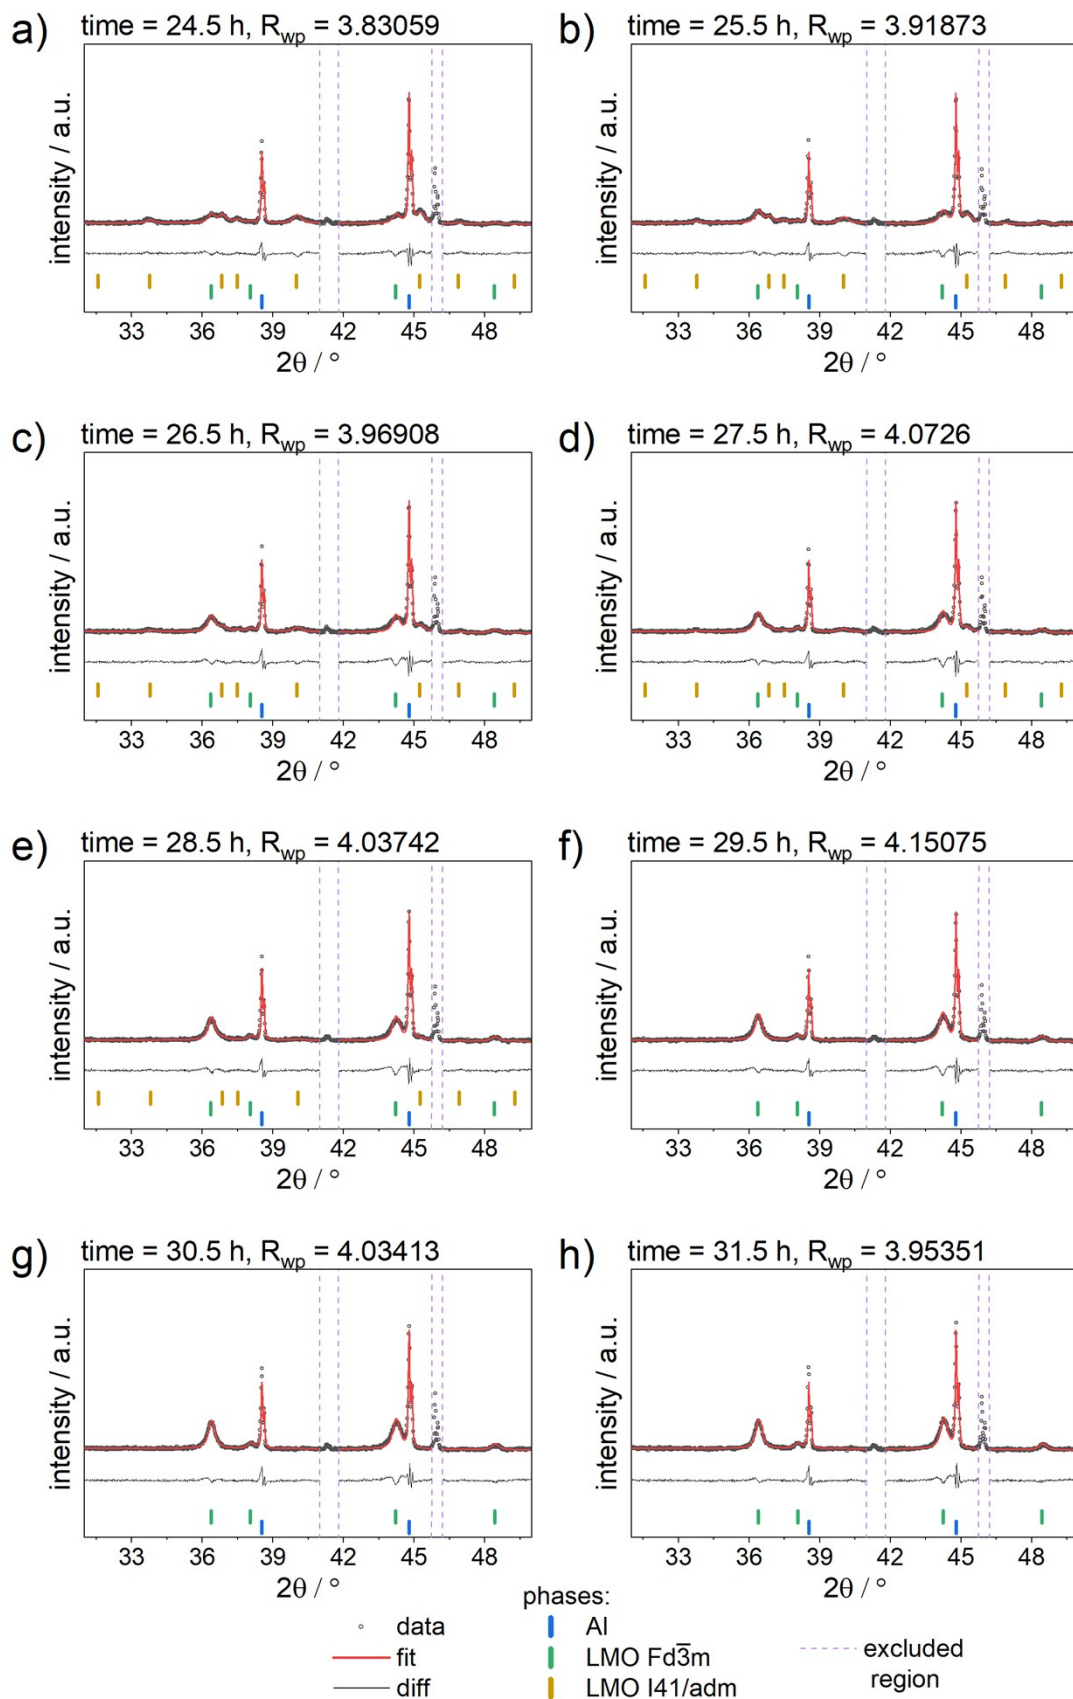

**Figure S.10.** Rietveld refinement results of *operando* XRD data of nano-sized spinel collected for scans 25 - 32 (a-h).

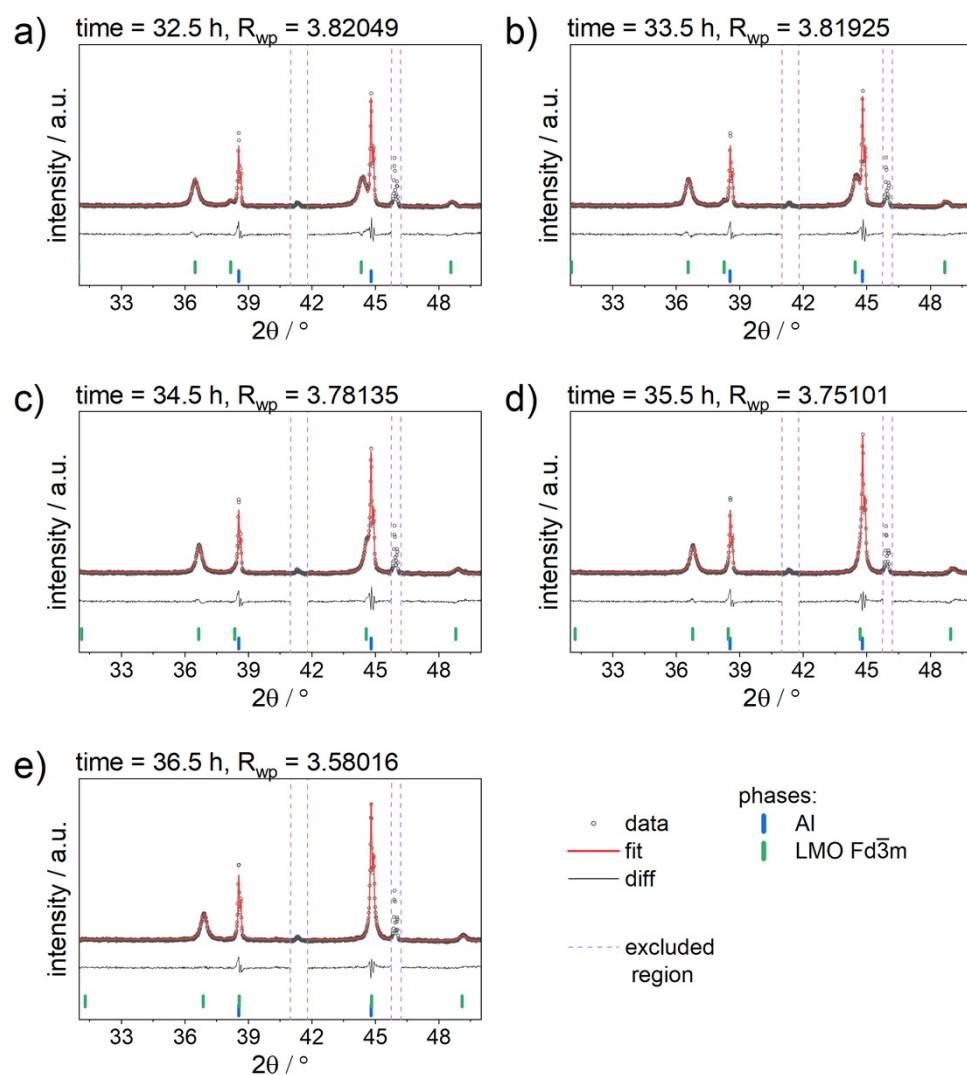

**Figure S.11.** Rietveld refinement results of *operando* XRD data of nano-sized spinel collected for scans 33 - 37 (a-e).

For the micron-sized spinel cathode (**Figure S.12**), it was observed that part of the active material is electronically inactive (~22%) due to some problems during the preparation of this electrode. Thus, the peak intensities presented in **Figure S.12b** were corrected by subtracting the diffraction pattern collected before cycling at OCP (used as a reference) from the subsequent diffraction patterns collected during cycling. The contour plot with the diffraction patterns before correcting for intensities is presented in **Figure S.12a**.

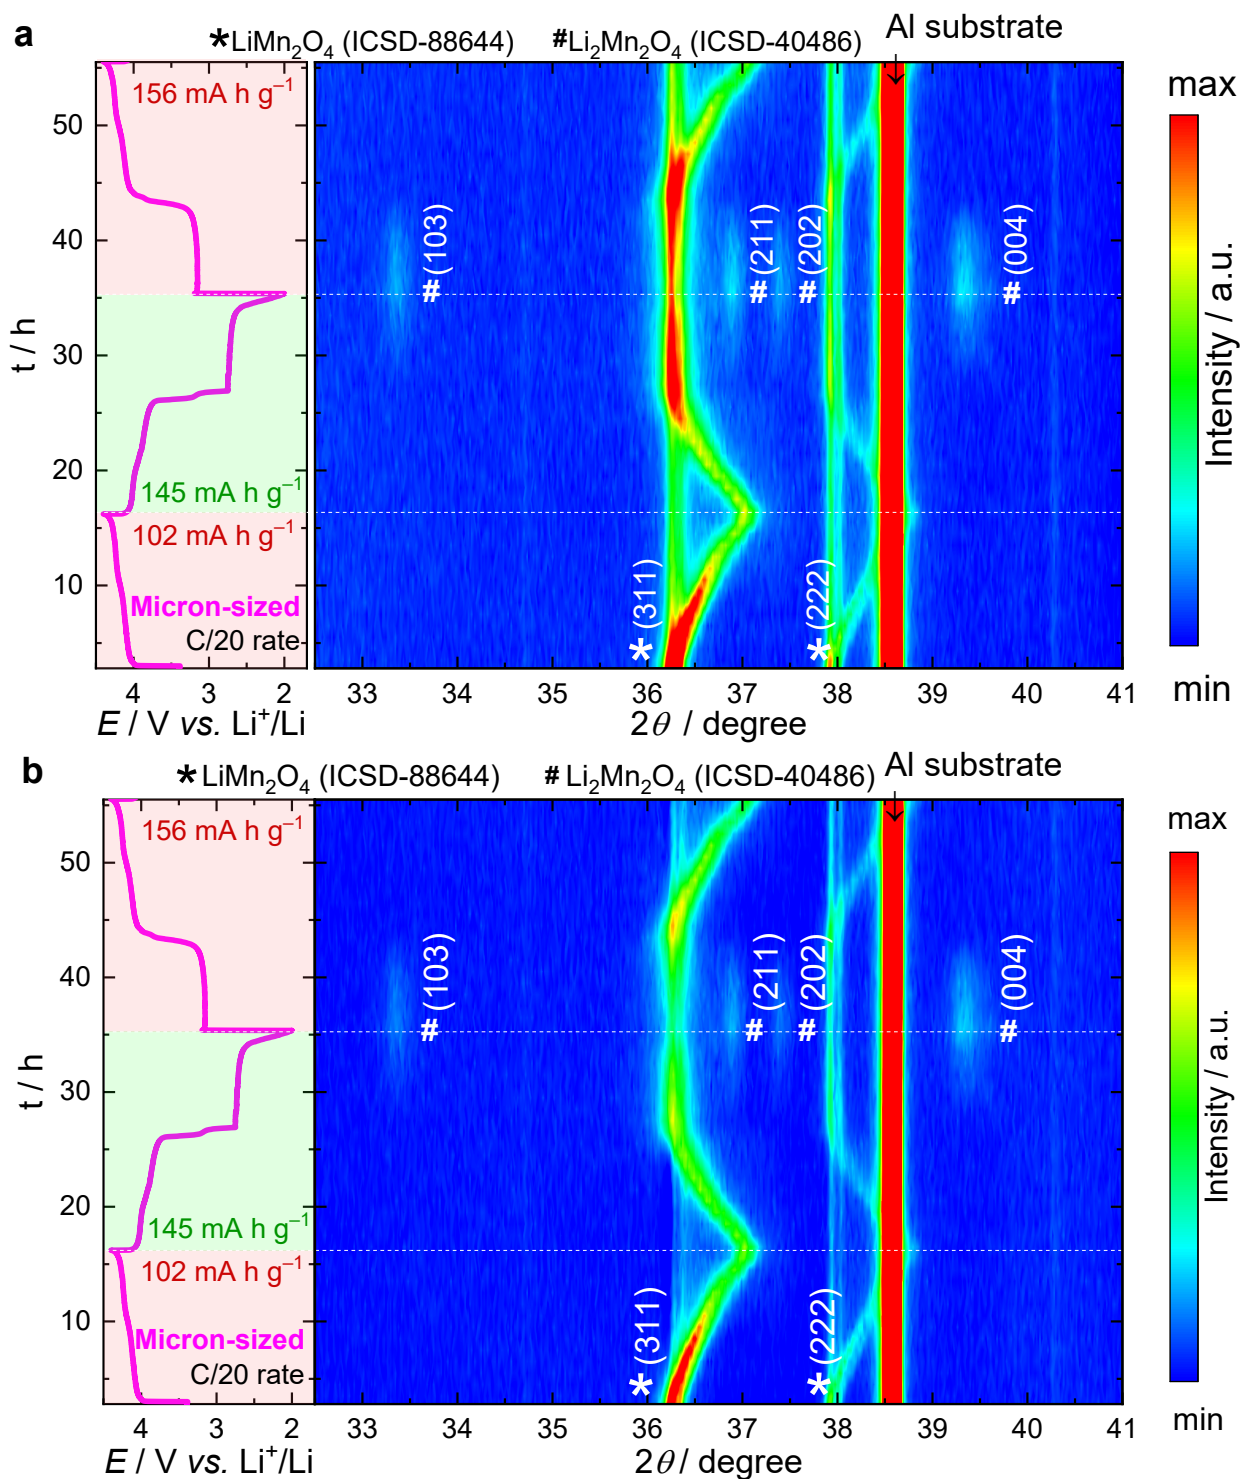

**Figure S.12.** *Operando* XRD analyses to track the evolution of different structures during 1<sup>st</sup> cycle and 2<sup>nd</sup> charge of electrode prepared from micron-sized  $\text{LiMn}_2\text{O}_4$  spinel (a) before and (b) after correction the patterns intensity.

For the nano-sized electrode, two distinct peaks rise with the increasing of cycle number, while for the micron-sized, the two peaks already appear in the first cycle (**Figure S.13**). Additionally, it was observed changes in the peak positions among the  $dQ/dV$  curves for the nano-sized, confirming the changes on the energy level of the tetrahedral sites for  $\text{Li}^+$  deintercalation/intercalation. It is good to mention here that it was observed only the tetrahedral phase in the diffraction patterns collected in this voltage range (**Figure 4**). No detectable change in the peak position among the  $dQ/dV$  curves was observed for the micron-sized cathode.

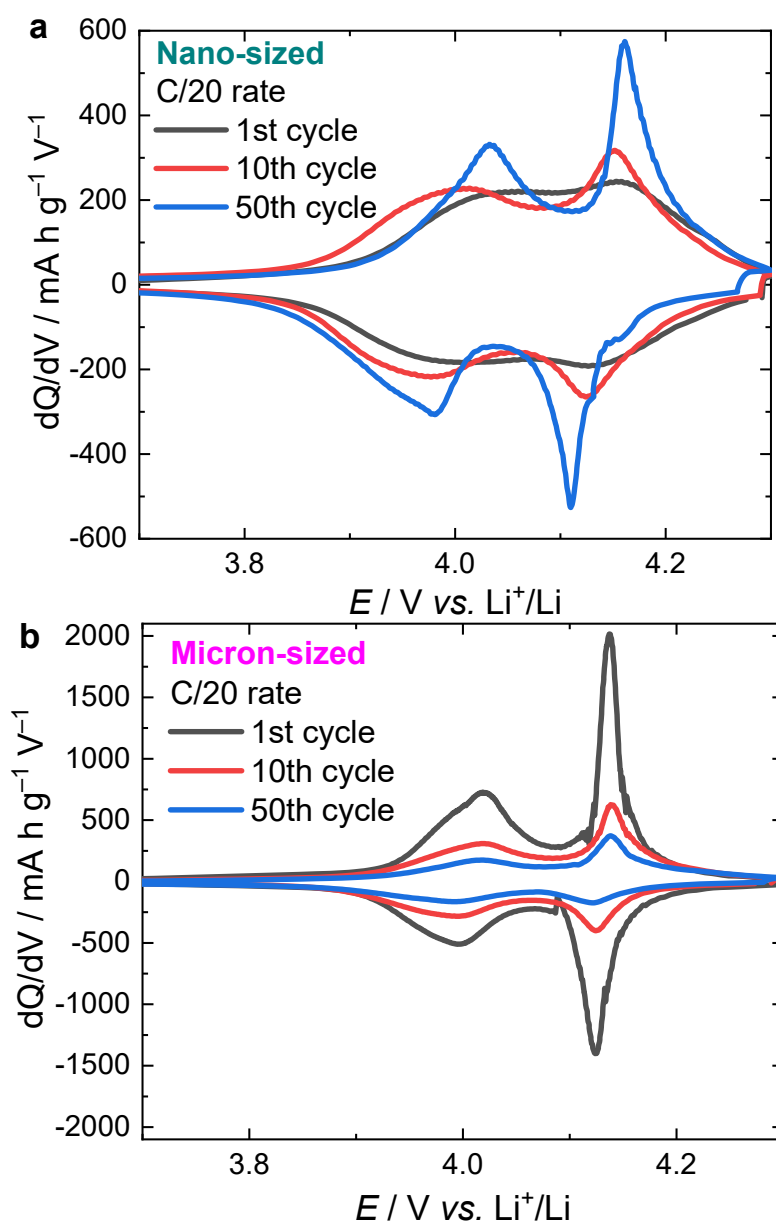

**Figure S.13.**  $dQ/dV$  curves obtained from 1<sup>st</sup>, 10<sup>th</sup>, and 50<sup>th</sup> cycle at C/20 rate presented in the **Figure 5c**, for (a) nano-sized and (b) micron-sized spinel cathodes.

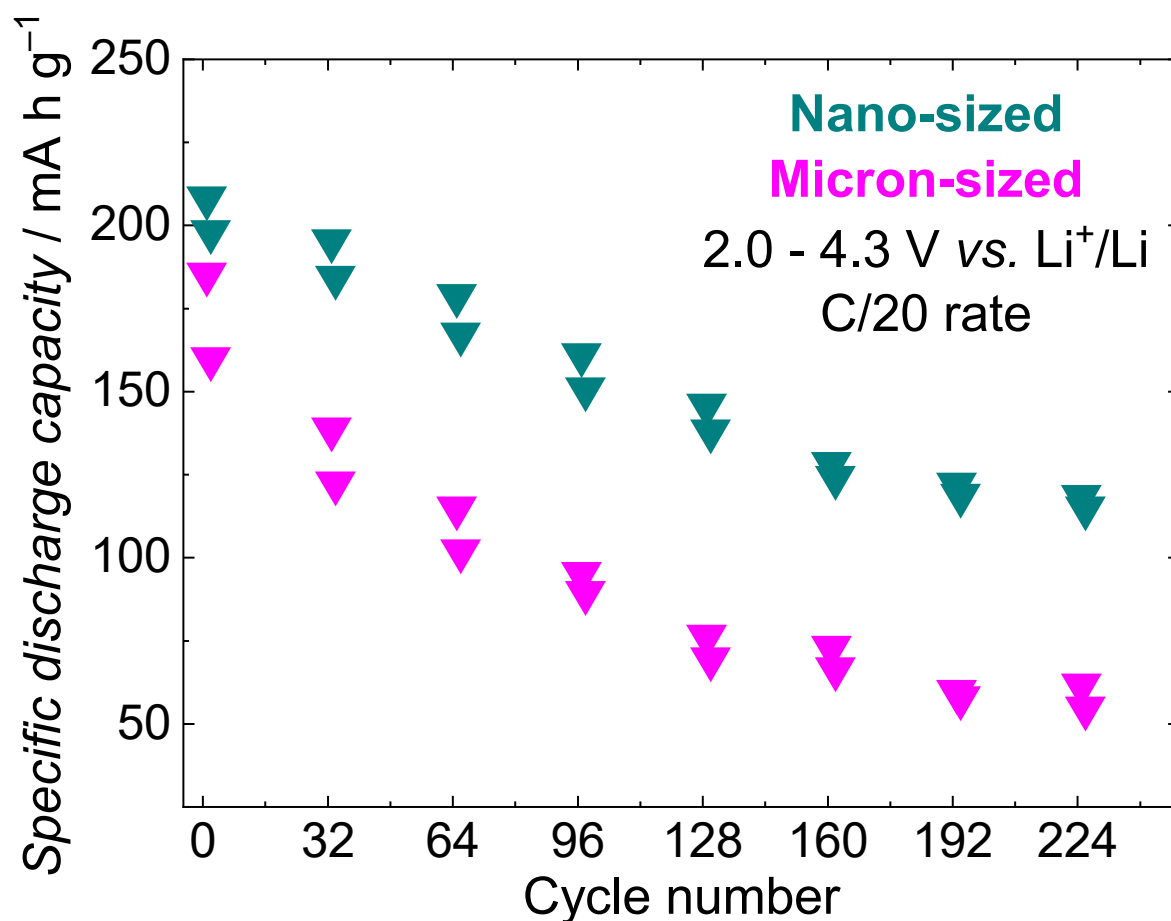

**Figure S.14.** Specific discharge capacity obtained for the nano and micron-sized spinel cathodes cycled in a voltage range of 2.0 – 4.3 V at C/20 rate using the cycling protocol presented. Both cathodes present a decay of the initial values of specific discharge capacity as the cycle number increases, being less pronounced for the cathode prepared from nano-sized than that from micron-sized spinel.

## References

- Falqueto, J. B., Clark, A. H., Štefančič, A., Smales, G. J., Vaz, C. A. F., Schuler, A. J., Bocchi, N., & El Kazzi, M. (2022). High Performance Doped Li-Rich  $\text{Li}_{1+x}\text{Mn}_{2-x}\text{O}_4$  Cathodes Nanoparticles Synthesized by Facile, Fast, and Efficient Microwave-Assisted Hydrothermal Route. *ACS Applied Energy Materials*, 5(7), 8357–8370. <https://doi.org/10.1021/acsaem.2c00902>
